# Supplementary material
Source: PubMed Central journal article supplement (PMC4724865)
Supplement: NIHMS744107-supplement-2.pdf [file NIHMS744107-supplement-2.pdf]

**A** Alternatives for organizing variables into hierarchies ("Random Effects" hierarchies)

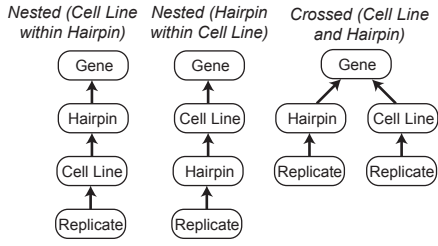

Each variable can be associated with an intercept and/or slope adjustment

| Structure Name | Relation Between Variables | Variables Included in Structure | Detailed Description                                                                                                           | Compared to siMEM (S6)        |
|----------------|----------------------------|---------------------------------|--------------------------------------------------------------------------------------------------------------------------------|-------------------------------|
| S1             | Single variable            | Hairpin                         | Hairpin (random intercept)                                                                                                     | Simpler                       |
| S2             | Single variable            | Hairpin                         | Hairpin (random slope)                                                                                                         | Simpler                       |
| S3             | Single variable            | Hairpin                         | Hairpin (random intercept+slope)                                                                                               | Simpler                       |
| S4             | Nested variables           | Cell Line, Hairpin              | Nested: Cell Line (random intercept), nested in Hairpin (random intercept+slope)                                               | Simpler                       |
| S5             | Nested variables           | Cell Line, Hairpin              | Nested: Cell Line (random slope), nested in Hairpin (random intercept+slope)                                                   | Simpler                       |
| S6 (siMEM)     | Nested variables           | Cell Line, Hairpin              | Nested: Cell Line (random intercept+slope), nested in Hairpin (random intercept+slope)                                         | Same                          |
| S7             | Nested variables           | Cell Line, Hairpin, Replicate   | Nested: Replicate (random intercept), nested in Cell Line (random intercept+slope), nested in Hairpin (random intercept+slope) | More complex                  |
| S8             | Nested variables           | Cell Line, Hairpin, Replicate   | Nested: Replicate (random slope), nested in Cell Line (random intercept+slope), nested in Hairpin (random intercept+slope)     | More complex                  |
| S9             | Nested variables           | Cell Line, Hairpin              | Nested: Hairpin (random intercept+slope), nested in Cell Line (random intercept+slope)                                         | Different – nested variables  |
| S10            | Crossed variables          | Cell Line, Hairpin              | Crossed Cell Line (random intercept+slope) and Hairpin (random intercept+slope)                                                | Different – crossed variables |

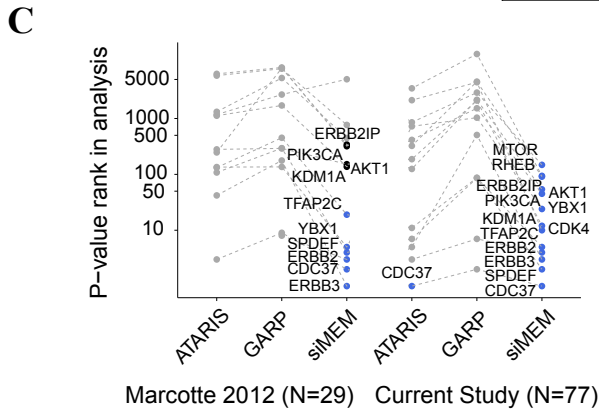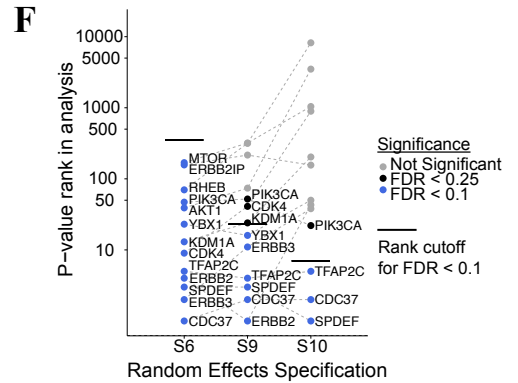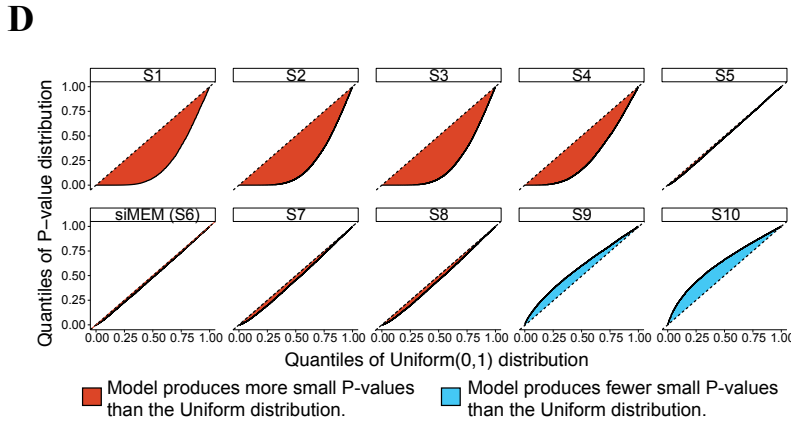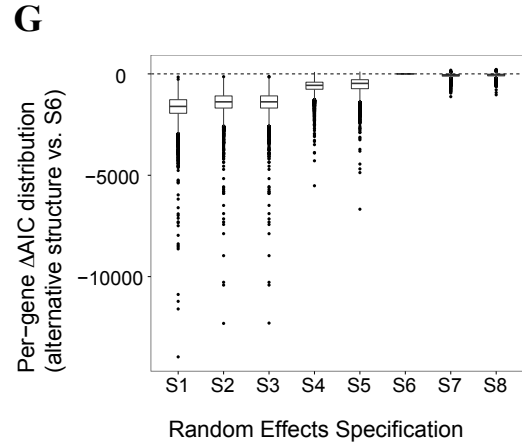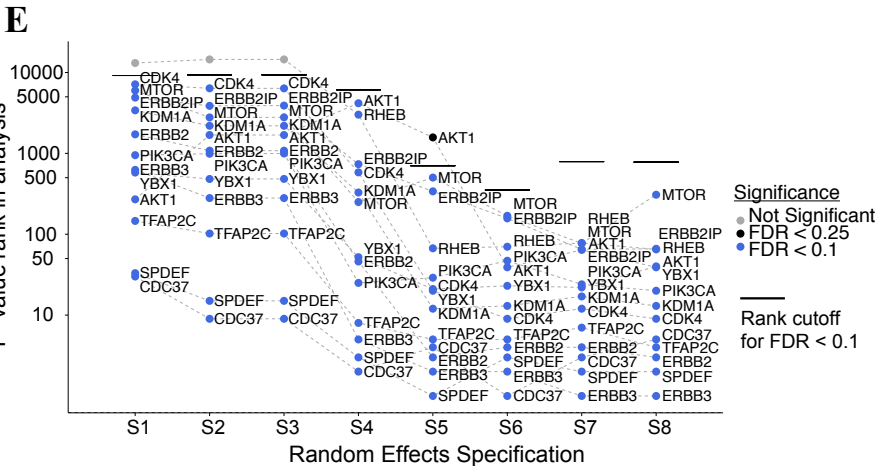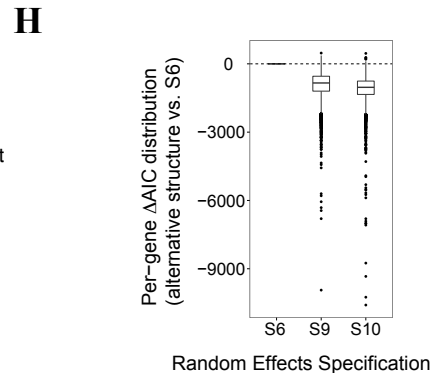

Supplementary Figure 2
