# Supplementary material
Source: PubMed Central journal article supplement (PMC4724865)
Supplement: NIHMS744107-supplement-4.pdf [file NIHMS744107-supplement-4.pdf]

**A**

**MetabRIC Region 21  
CCND1**

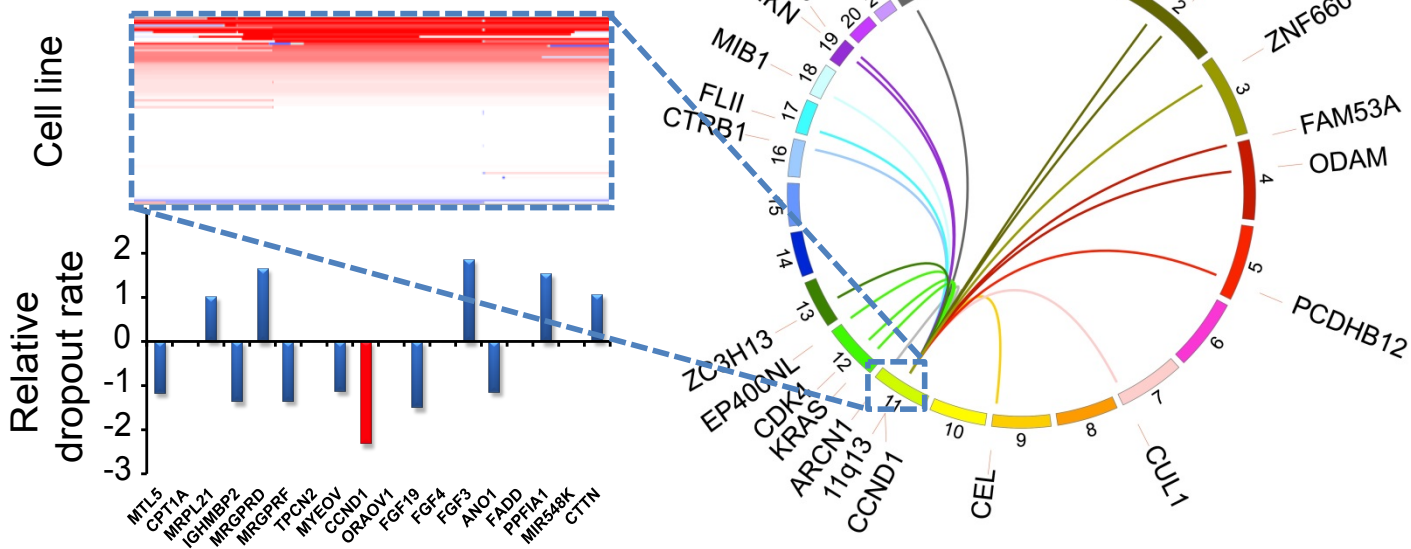

**B**

| <u>METABRIC region</u> | <u>gene</u> | <u>FDR (expression)</u> | <u>FDR (essentiality)</u> |
|------------------------|-------------|-------------------------|---------------------------|
| 1                      | PNMA2       | 5.94E-02                | 7.45E-02                  |
| 10                     | EGFR        | 9.25E-02                | 2.69E-03                  |
| 21                     | CCND1       | 5.95E-03                | 1.98E-02                  |
| 35                     | EP300       | 7.76E-02                | 7.83E-02                  |
| 35                     | ERBB2       | 1.07E-05                | 7.38E-07                  |
| 35                     | NOS3        | 7.72E-02                | 8.21E-02                  |
| 35                     | TFAP2C      | 9.42E-02                | 8.87E-05                  |
| 35                     | PEX11A      | 1.55E-02                | 6.69E-02                  |
| 35                     | RAB22A      | 1.55E-02                | 4.81E-02                  |
| 37                     | CCND1       | 8.62E-02                | 1.76E-06                  |
| 37                     | FOXA1       | 8.25E-02                | 4.28E-05                  |
| 37                     | SPDEF       | 8.25E-02                | 1.06E-03                  |
| 42                     | TFAP2C      | 2.54E-03                | 3.24E-07                  |

**C**

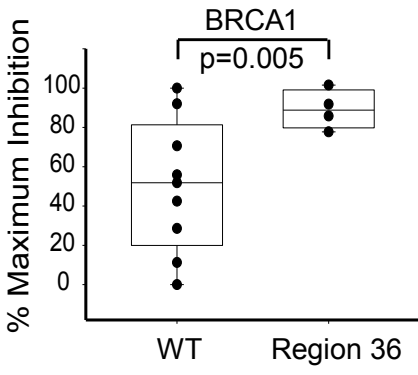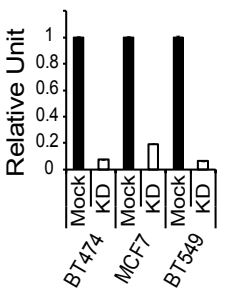

**D**

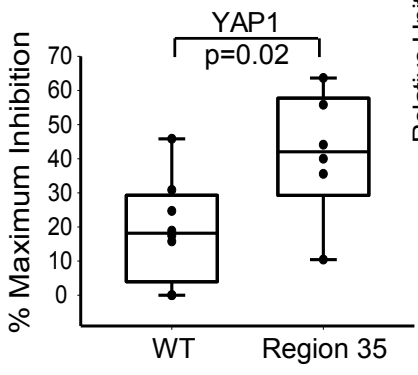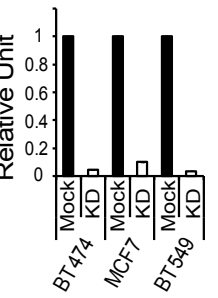

**Supplementary Figure 4**
