# Supplementary material
Source: PubMed Central journal article supplement (PMC4724865)

**A**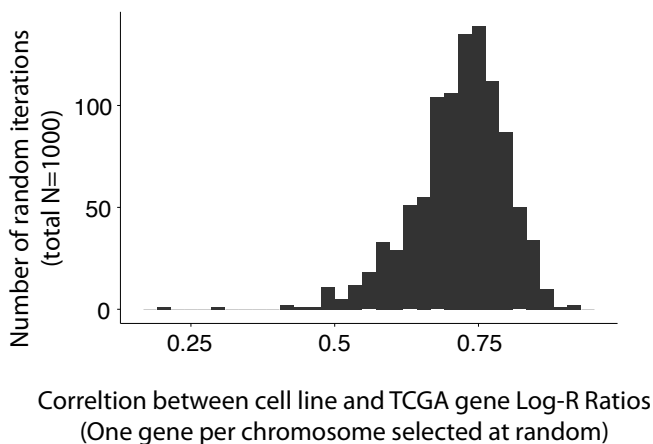**B**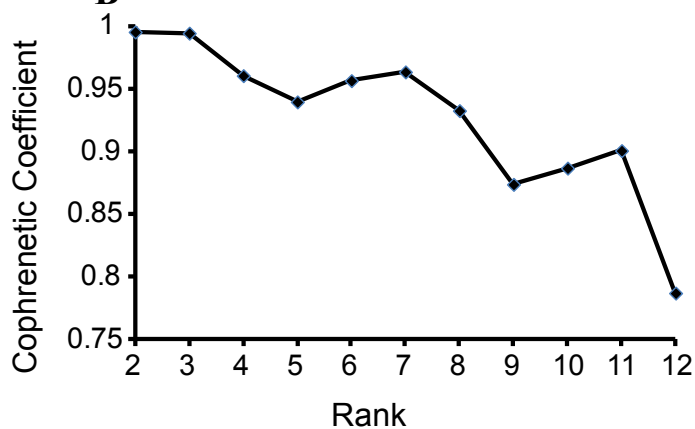**C**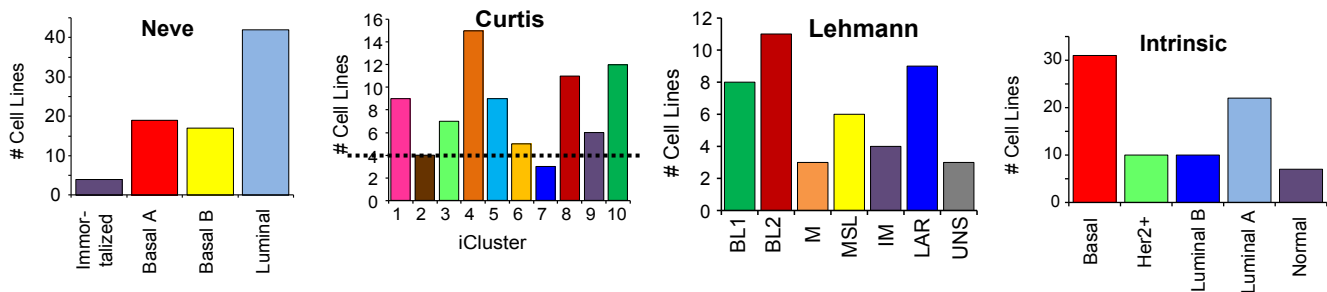**D**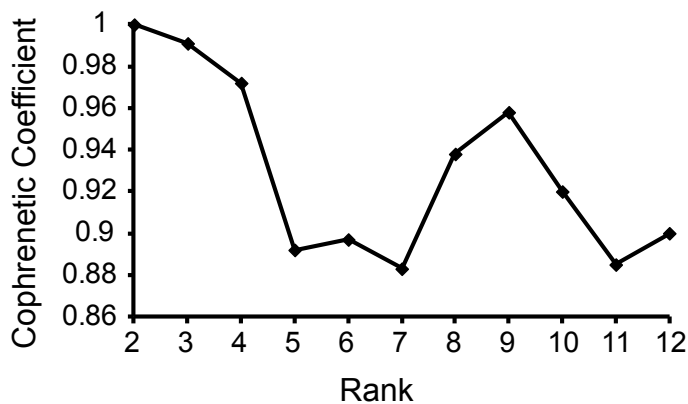**E**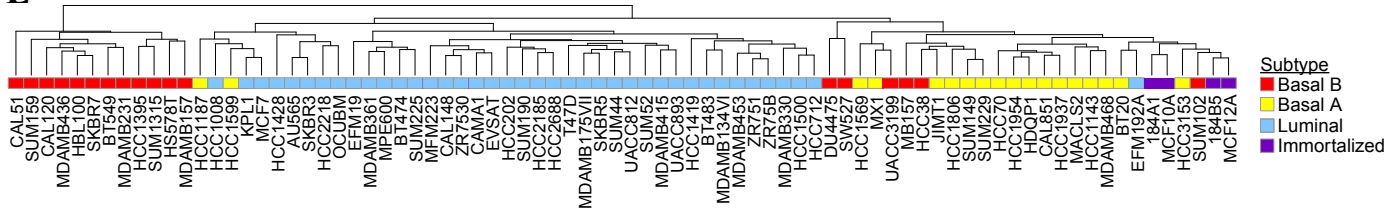

Supplementary Figure 1

Supplement: NIHMS744107-supplement-1.pdf [file NIHMS744107-supplement-1.pdf]

**A**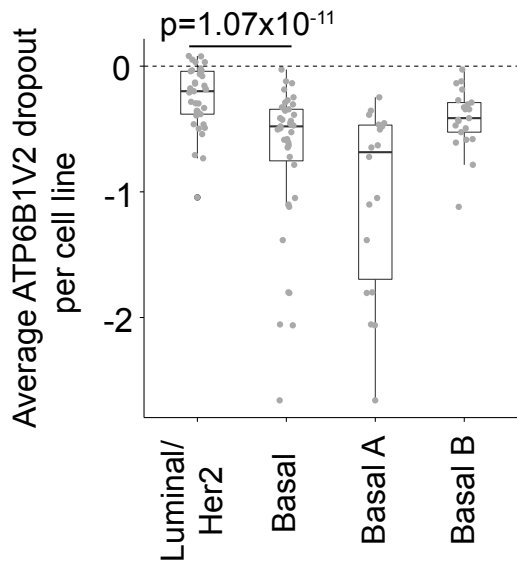**B**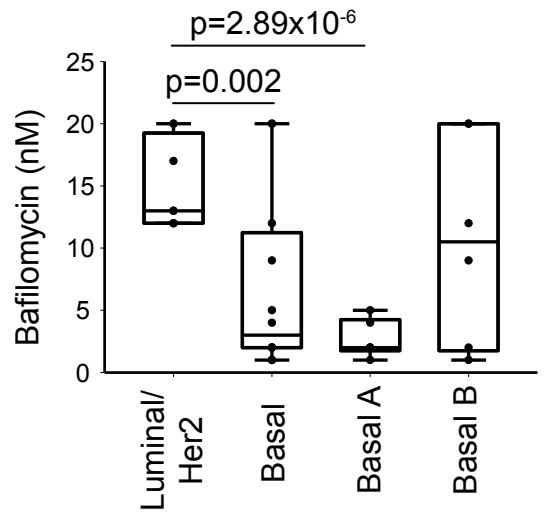**C**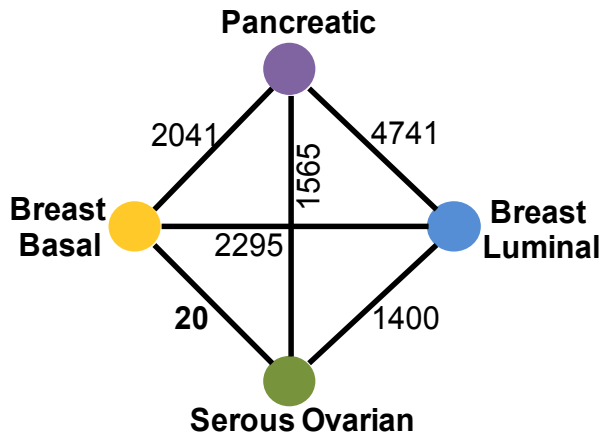**D**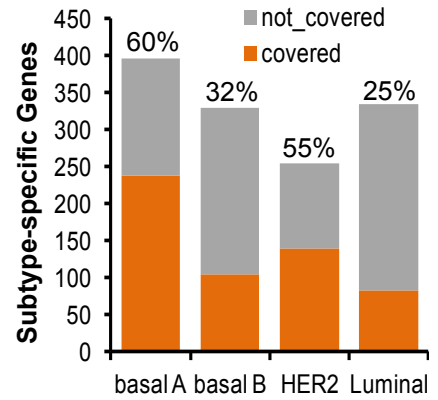**E**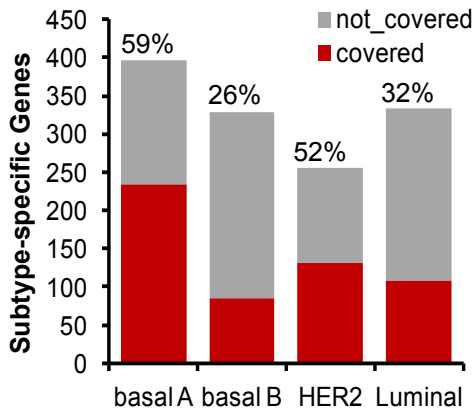**F**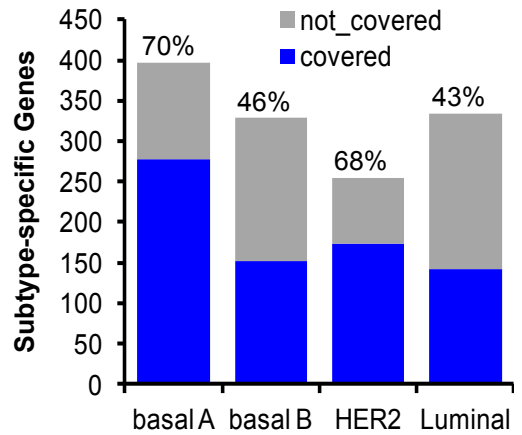**Supplementary Figure 3**

Supplement: NIHMS744107-supplement-3.pdf [file NIHMS744107-supplement-3.pdf]

**A**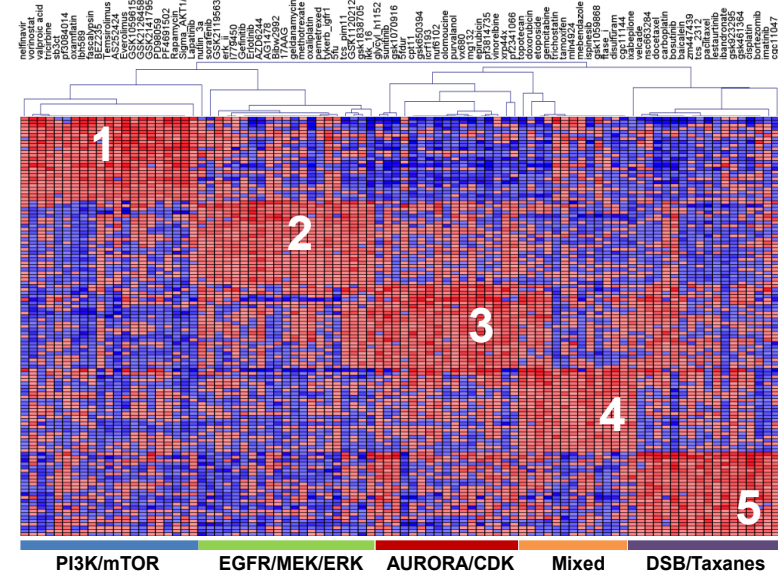**B**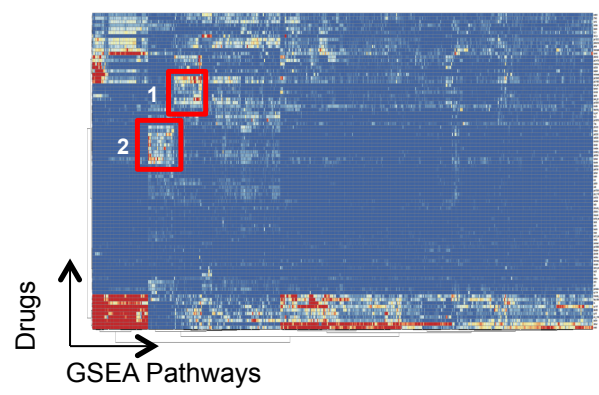**C**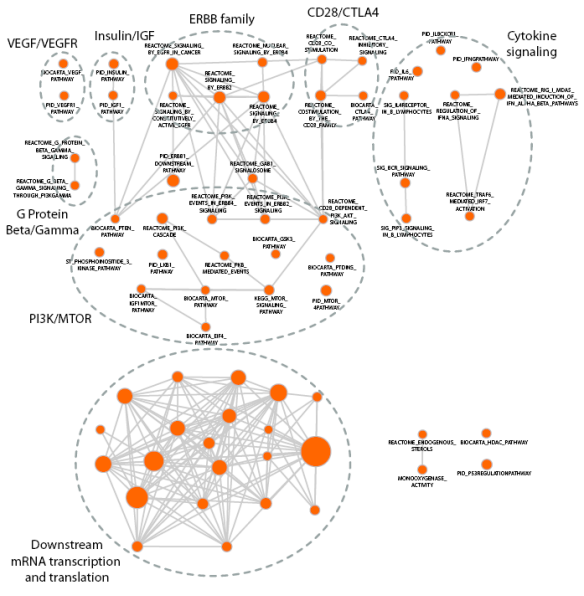**D**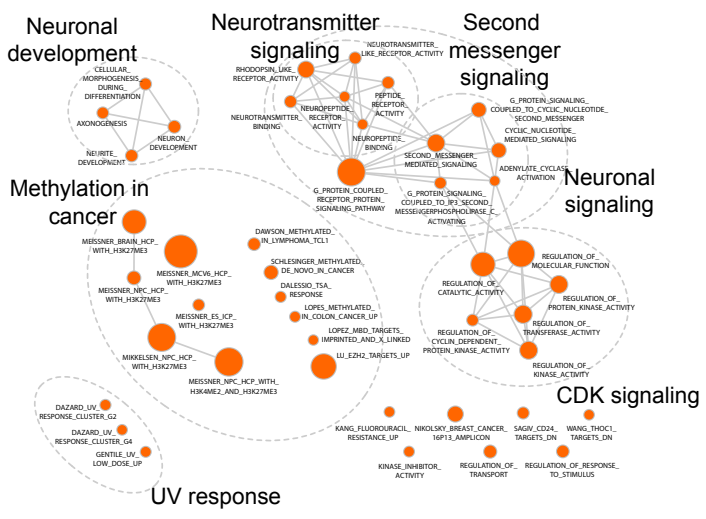**E**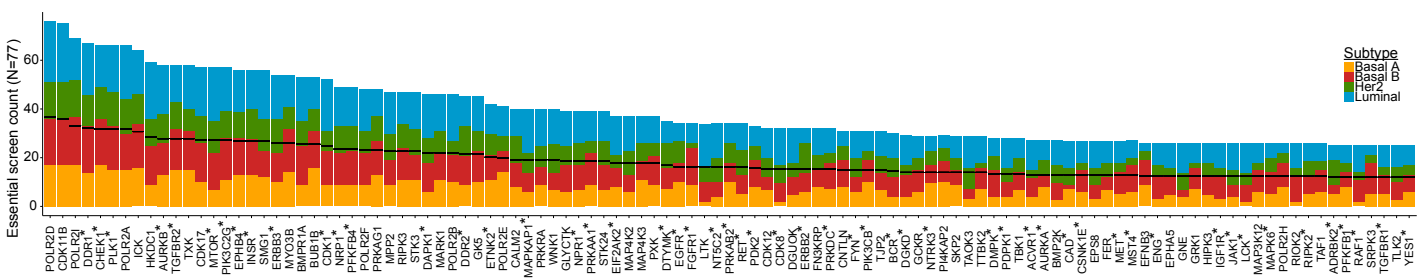

Supplementary Figure 5

Supplement: NIHMS744107-supplement-5.pdf [file NIHMS744107-supplement-5.pdf]

A

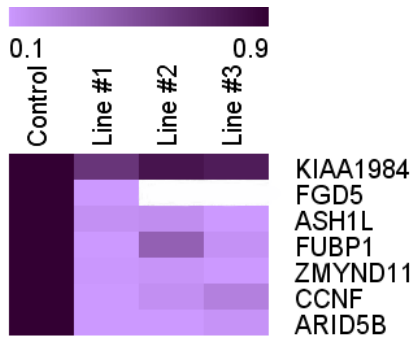

B

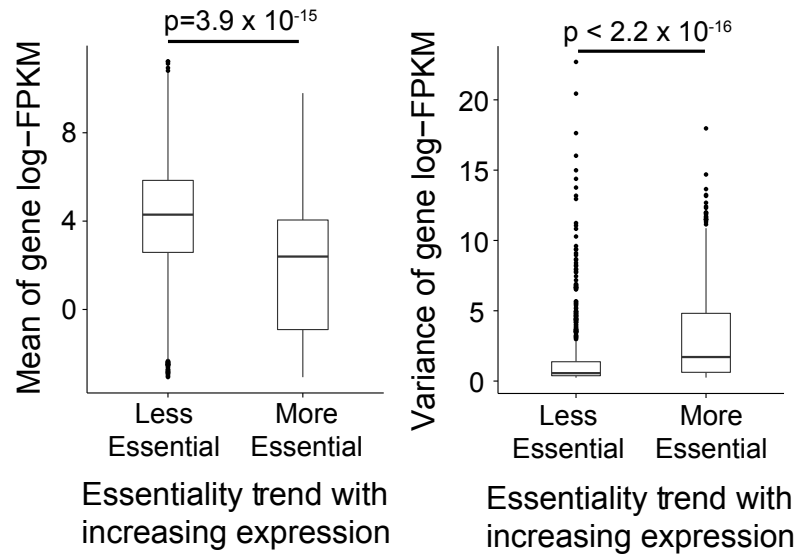

C

| Gene   | # homozygous deletions |
|--------|------------------------|
| ACACA  | 10                     |
| RB1    | 3                      |
| HS6ST2 | 2                      |
| DNHD1  | 1                      |
| ATP5L  | 1                      |

Supplement: NIHMS744107-supplement-6.pdf [file NIHMS744107-supplement-6.pdf]

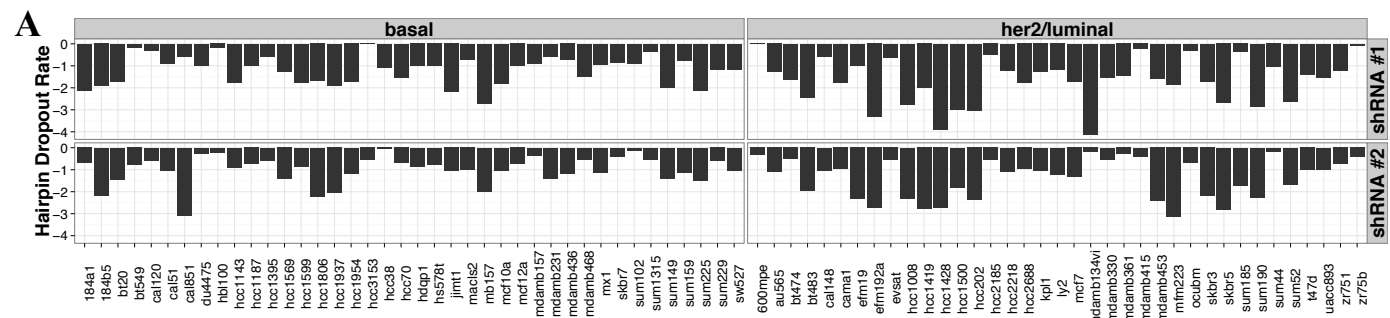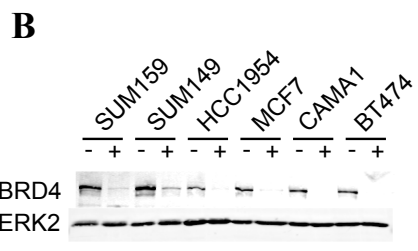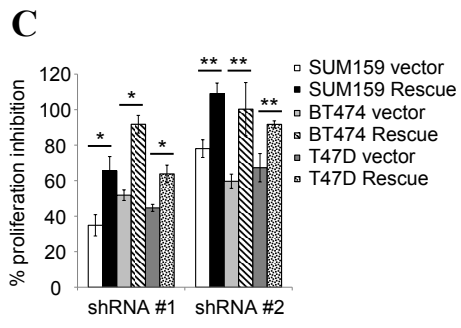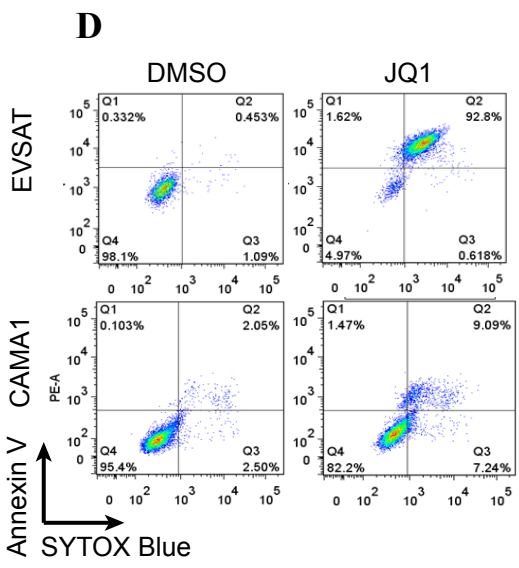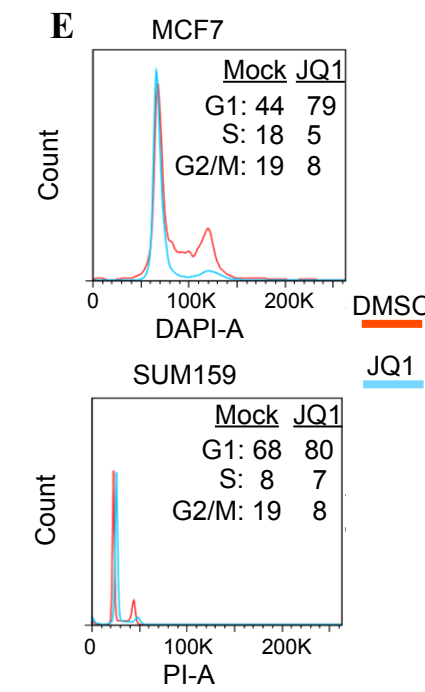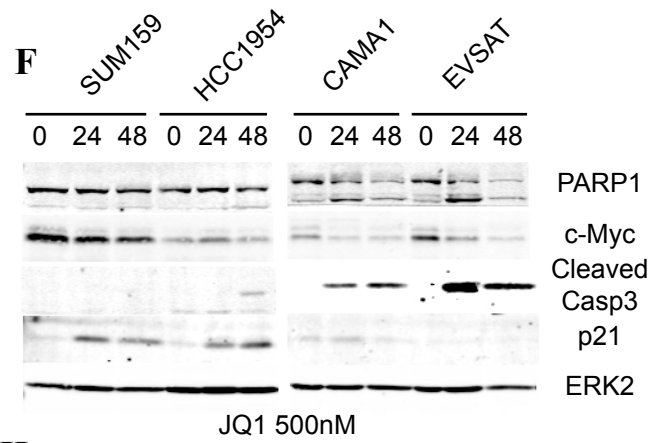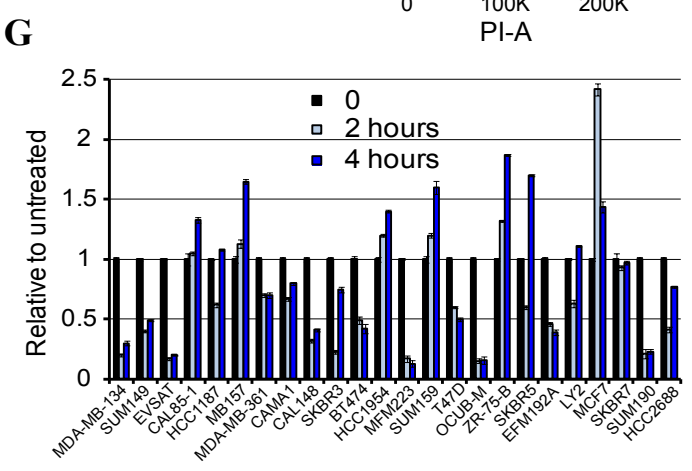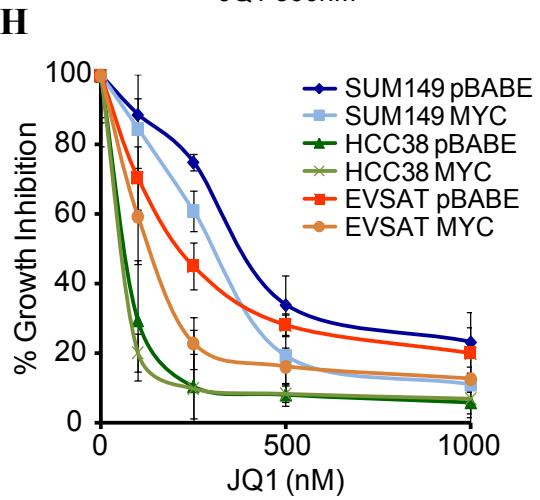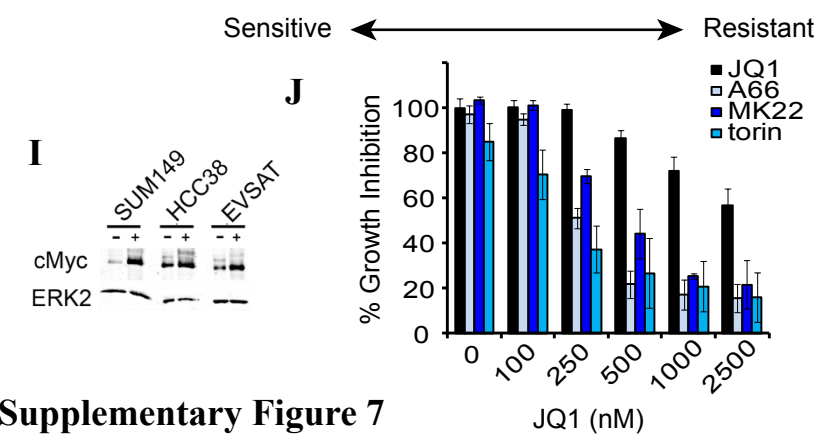

Supplementary Figure 7

Supplement: NIHMS744107-supplement-7.pdf [file NIHMS744107-supplement-7.pdf]
